# Supplementary material
Source: publisher figshare collection journal article supplement (https://acs.figshare.com/ndownloader/files/5720289)
Supplement: Supplementary file 1 [file 5720289]

$\text{ZrCl}_4(\text{THF})_2$  (0.377 g, 1.00 mmol) in THF (20 mL) at  $-78\text{ }^\circ\text{C}$ . The mixture was allowed to warm to room temperature and stirred for 15 h. The resulting mixture was concentrated *in vacuo* to afford a yellow solid. Diethyl ether (20 mL) was added to the solid, and the mixture was stirred for 5 min. The resulting mixture was filtered, and the solid residue was washed with diethyl ether (10 mL  $\times 2$ ). The combined organic filtrates were concentrated *in vacuo* to yield a yellow solid. The solid was recrystallized from a diethyl ether / *n*-hexane (2 / 15) solution at  $-40\text{ }^\circ\text{C}$  to give complex **15** (0.075 g, 0.07 mmol) as a yellow powder in 7 % yield.  $^1\text{H-NMR}$  ( $\text{CDCl}_3$ ):  $\delta$ . 1.14 (d,  $J = 5\text{ Hz}$ , 12H, isopropyl-Me), 1.71, (s, 12H, cumyl-Me), 1.73 (s, 12H, cumyl-Me), 3.70-3.80 (m, 2H, CH), 6.90-7.41 (m, 32H, aromatic-H), 8.42 (s, 2H,  $\text{CH}=\text{N}$ ). Anal. Found; C, 73.57; H, 6.41; N, 2.34 %. Calcd for  $\text{ZrC}_{68}\text{H}_{72}\text{N}_2\text{O}_2\text{Cl}_2$ ; C, 73.48; H, 6.53; N, 2.52 %. FD-MS, 1110 ( $\text{M}^+$ ).

**4.  $^{13}\text{C}$ -NMR spectrum of polyethylene produced by complex 1 / MAO**

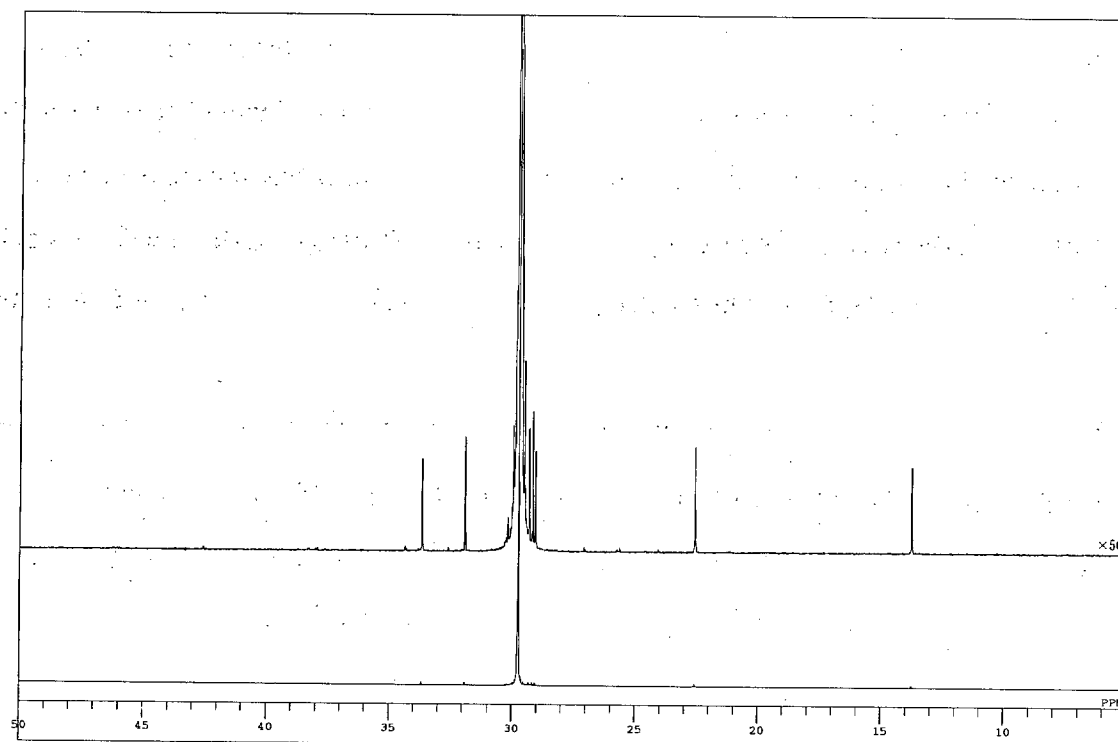

**Figure 1.**  $^{13}\text{C}$ -NMR spectra of polyethylene produced by complex 1 / MAO

[Solvent: *o*-dichlorobenzene]
